# Supplementary material for: A high-throughput reactor system for optimization of Mo–V–Nb mixed oxide catalyst composition in ethane ODH
Source: Royal Society of Chemistry journal article supplement (doi:10.1039/c5cy00488h), 2015-01-01
Supplement: c5cy00488h1.pdf [file c5cy00488h1.pdf]

## **High-throughput reactor system for optimization of Mo-V-Nb mixed oxide catalysts composition in ethane ODH**

Haibo Zhu,<sup>a</sup> Paco Laveille,<sup>a</sup> Devon C. Rosenfeld,<sup>b</sup> Mohamed Nejib Hedhili<sup>c</sup> and Jean-Marie Basset<sup>a</sup>

<sup>a</sup> KAUST Catalysis Center and KAUST Core Lab, King Abdullah University of Science and Technology, Thuwal 4700, Kingdom of Saudi Arabia

<sup>b</sup> The Dow Chemical Company, 2301 N. Brazosport Blvd., Freeport, TX 77541, USA

<sup>c</sup> KAUST Core Lab, King Abdullah University of Science and Technology, Thuwal 4700, Kingdom of Saudi Arabia

E-mail address: [jeanmarie.basset@kaust.edu.sa](mailto:jeanmarie.basset@kaust.edu.sa)

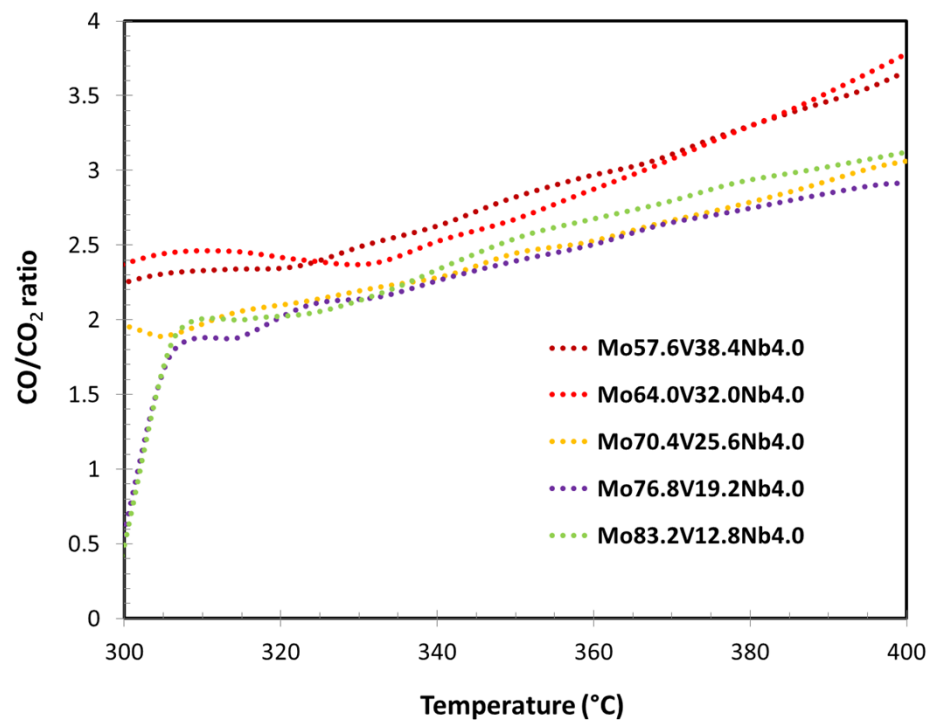

**Fig. S1** CO/CO<sub>2</sub> ratio in ethane ODH over typical Mo-V-Nb oxide catalysts with 4% Nb loading.

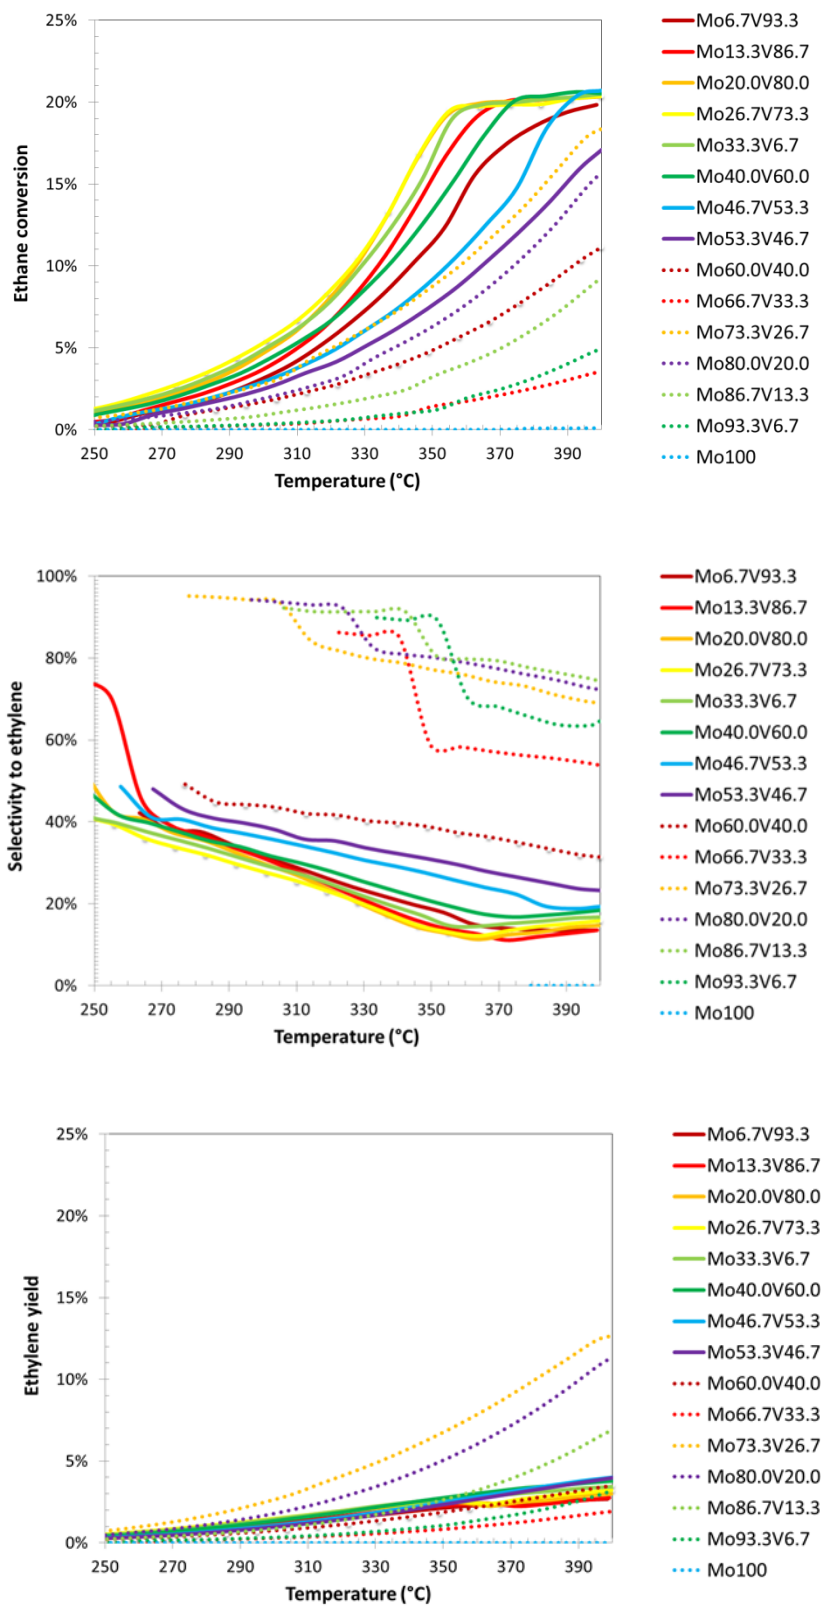

**Fig. S2** Ethane conversion, ethylene selectivity and ethylene yield in ethane ODH over Mo-V oxide catalysts without Nb.

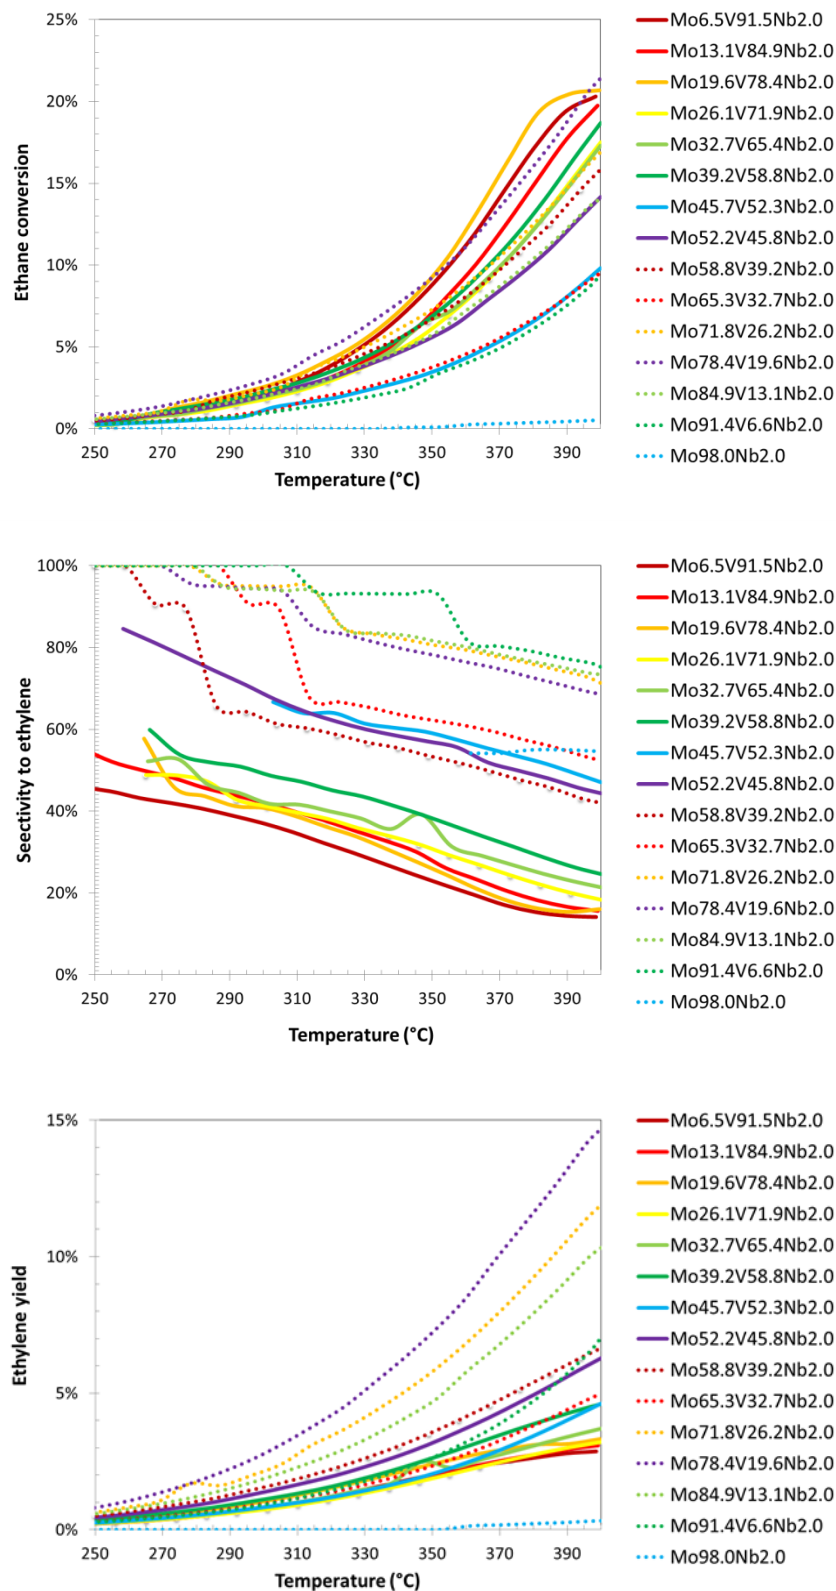

**Fig. S3** Ethane conversion, ethylene selectivity and ethylene yield in ethane ODH over Mo-V-Nb oxide catalysts with 2% Nb.

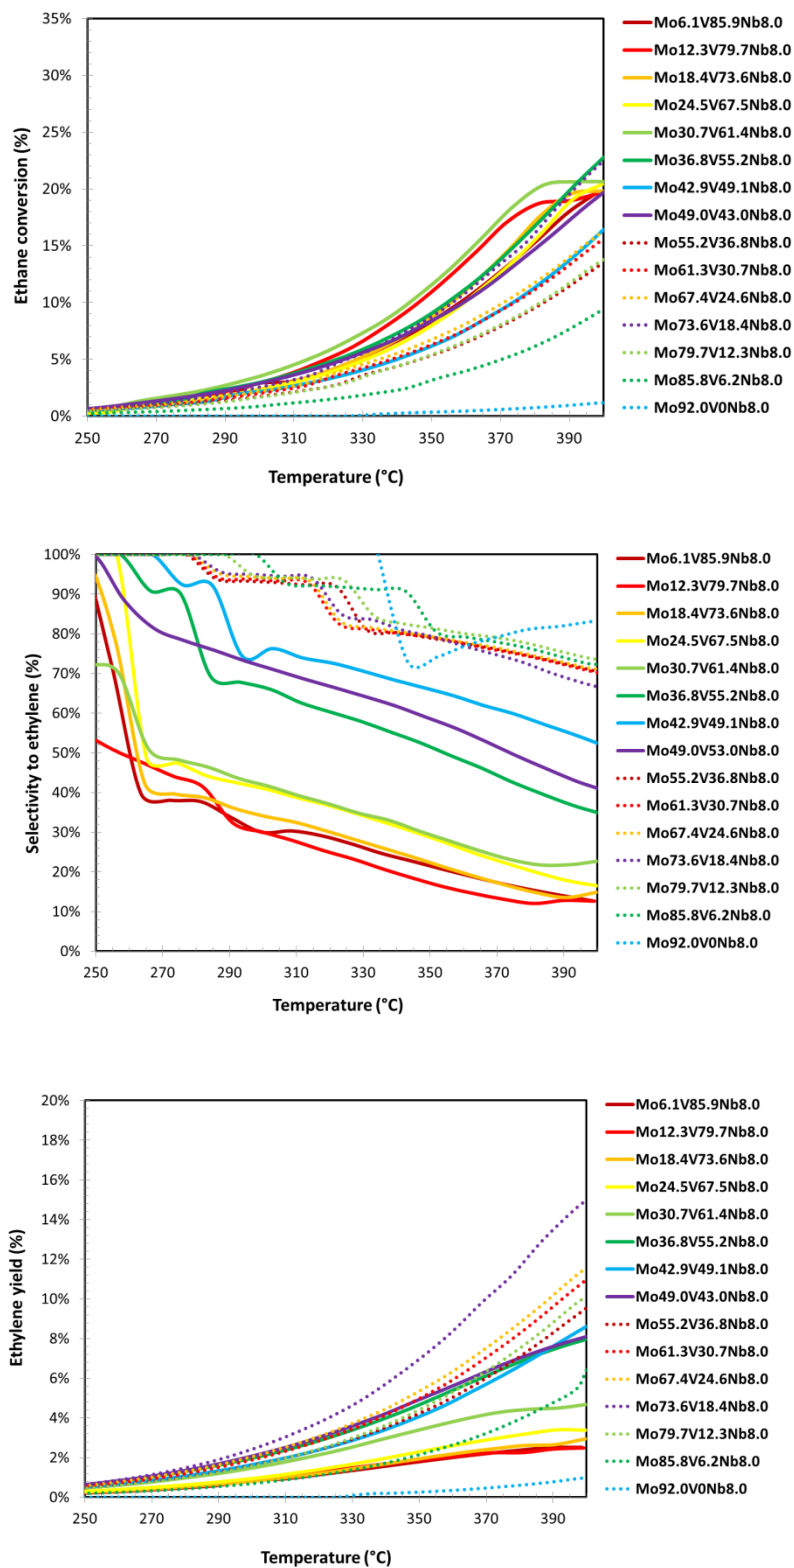

**Fig. S4** Ethane conversion, ethylene selectivity and ethylene yield in ethane ODH over Mo-V-Nb oxide catalysts with 8% Nb.

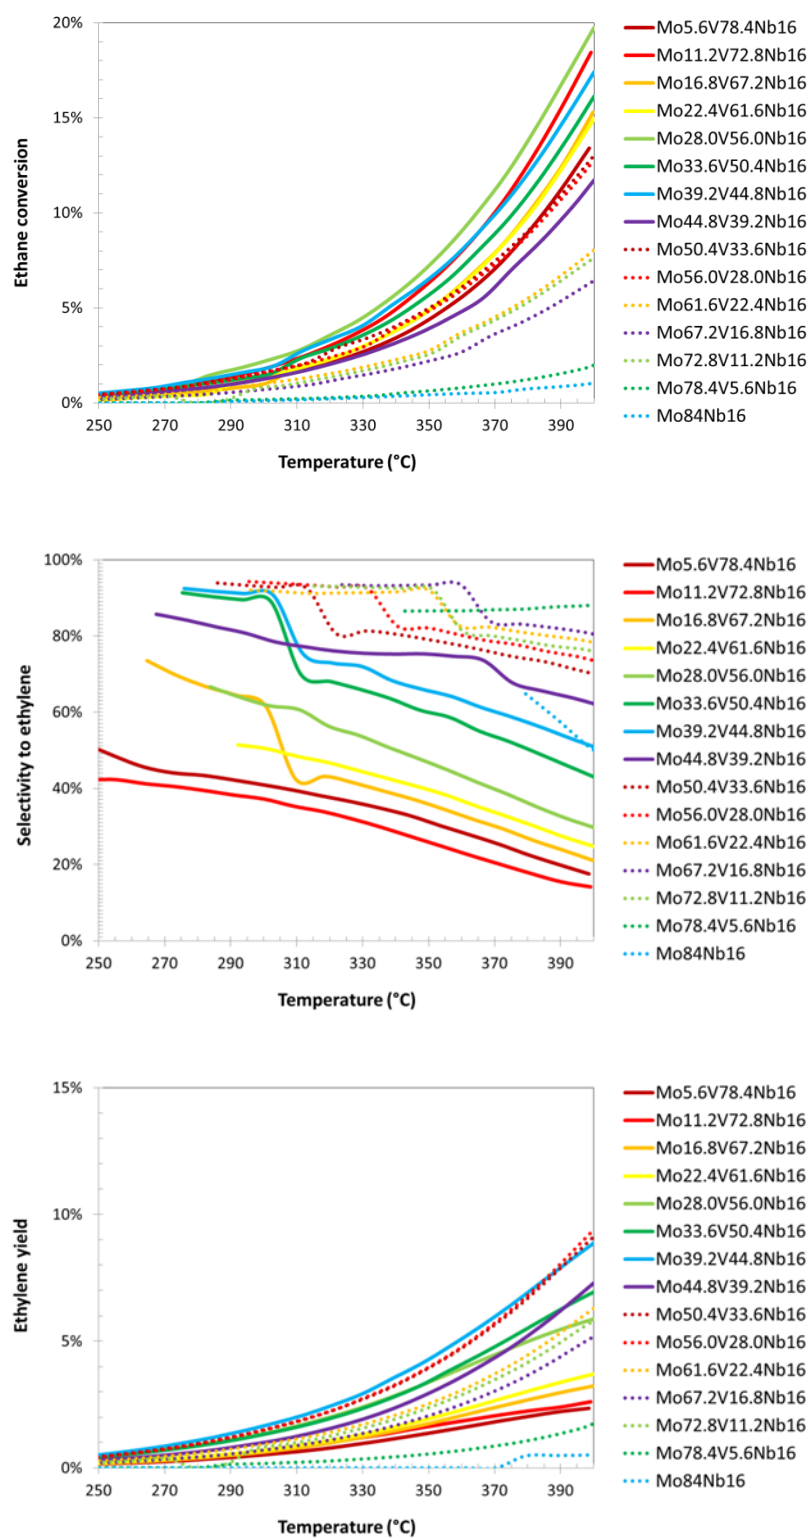

**Fig. S5** Ethane conversion, ethylene selectivity and ethylene yield in ethane ODH over Mo-V-Nb oxide catalysts with 16% Nb.

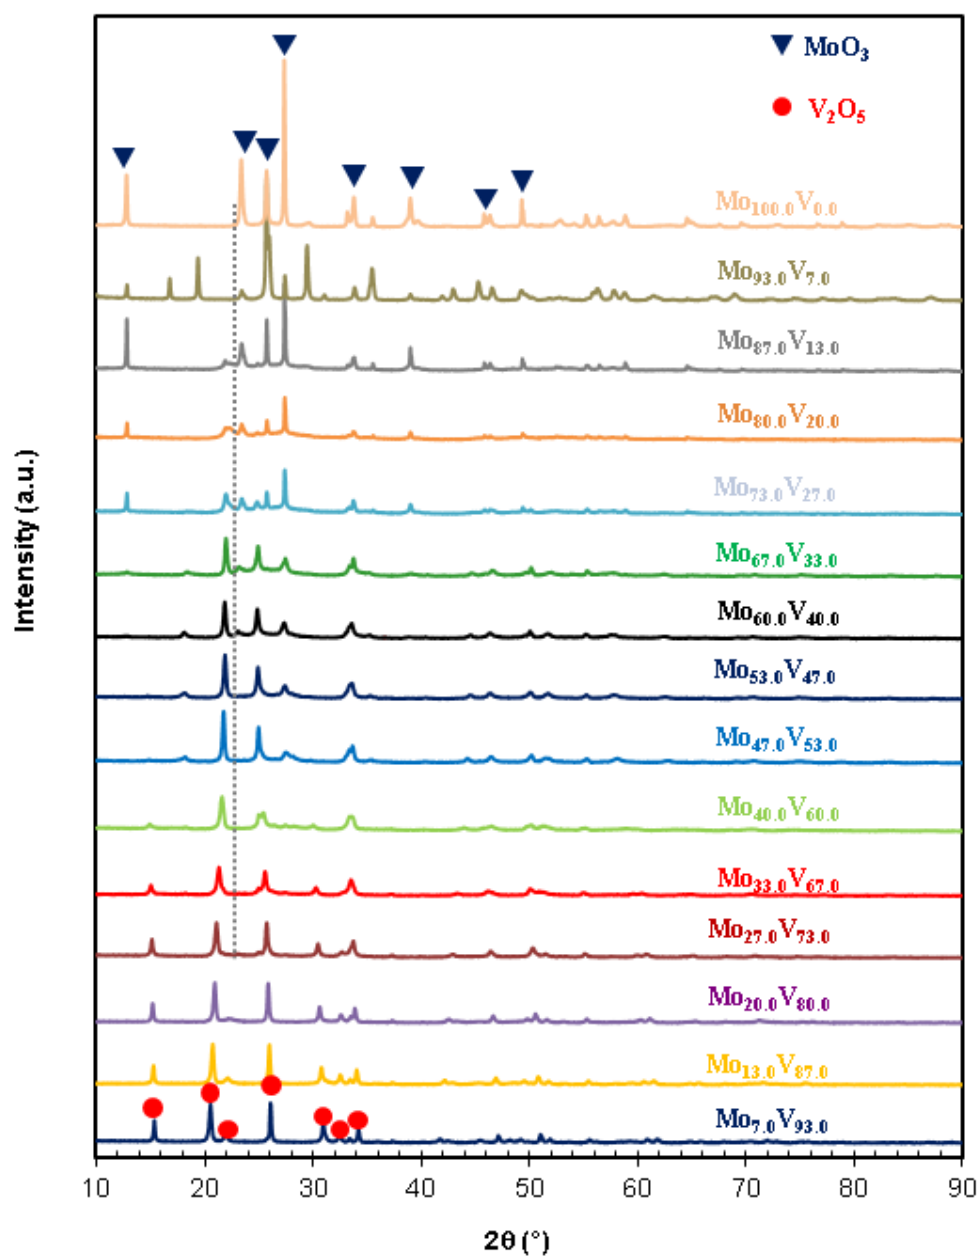

Fig. S6 XRD pattern of Mo-V mixed oxide samples without Nb.

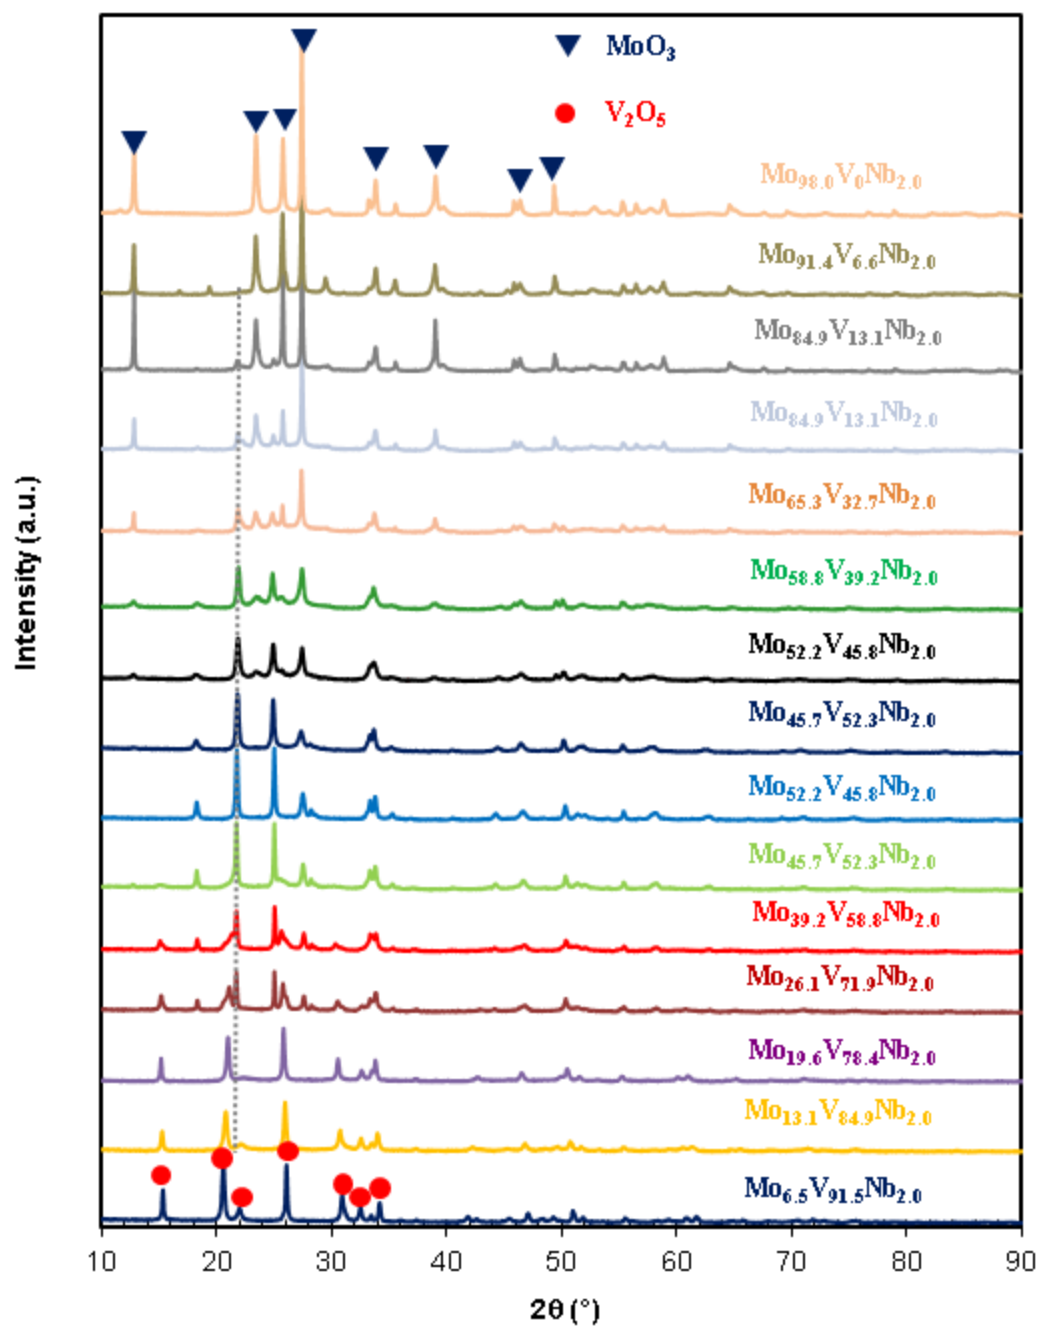

Fig. S7 XRD pattern of Mo-V-Nb mixed oxide samples with 2% of Nb loading.



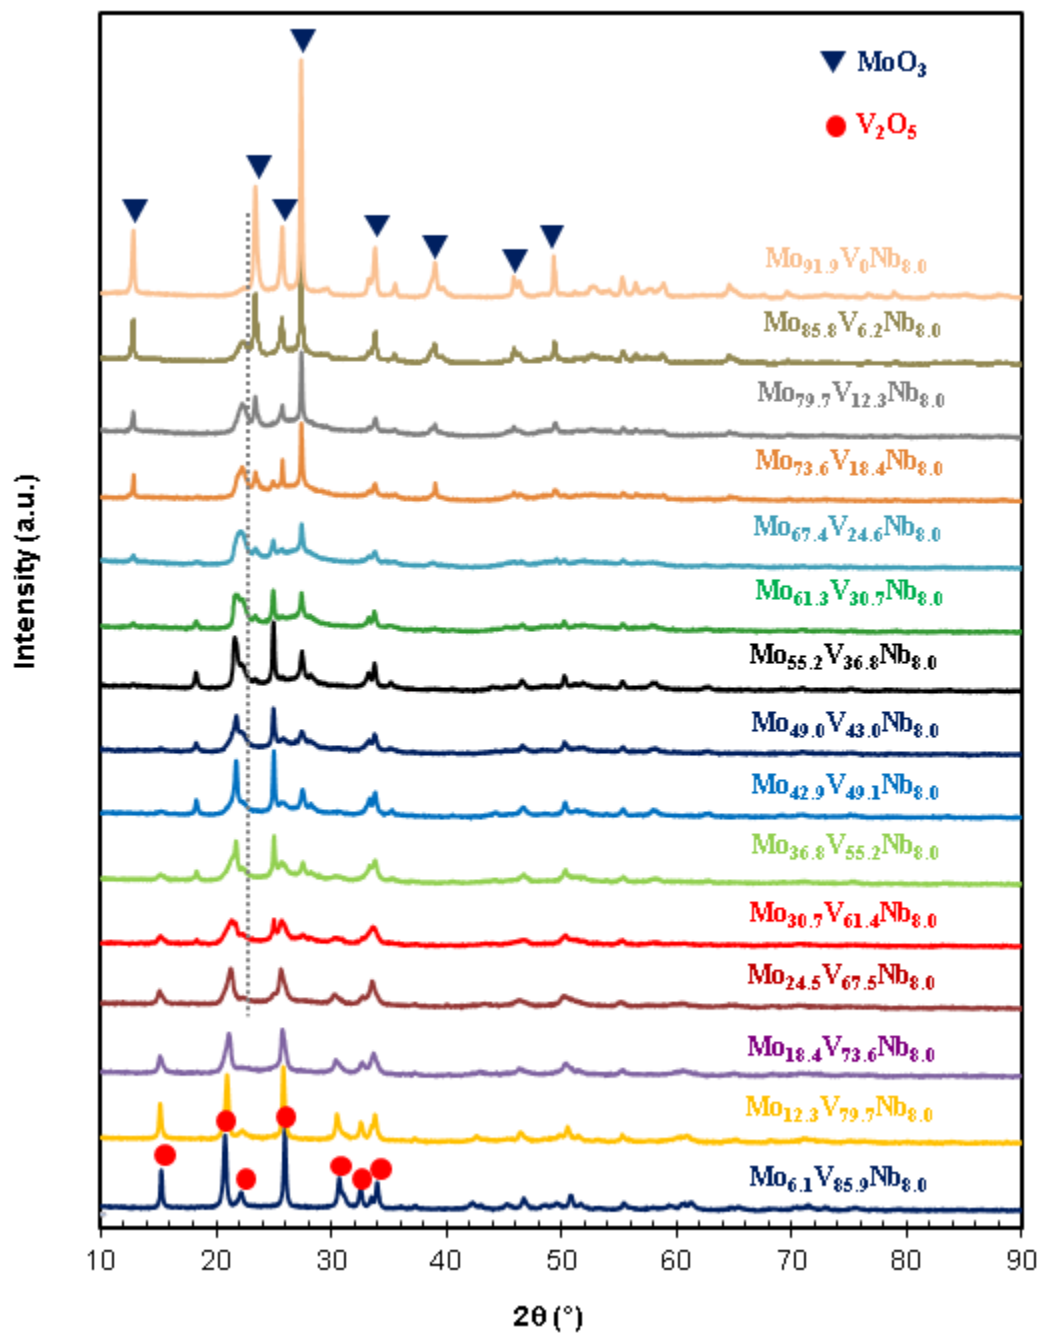

Fig. S8 XRD pattern of Mo-V-Nb mixed oxide samples with 8% of Nb loading.

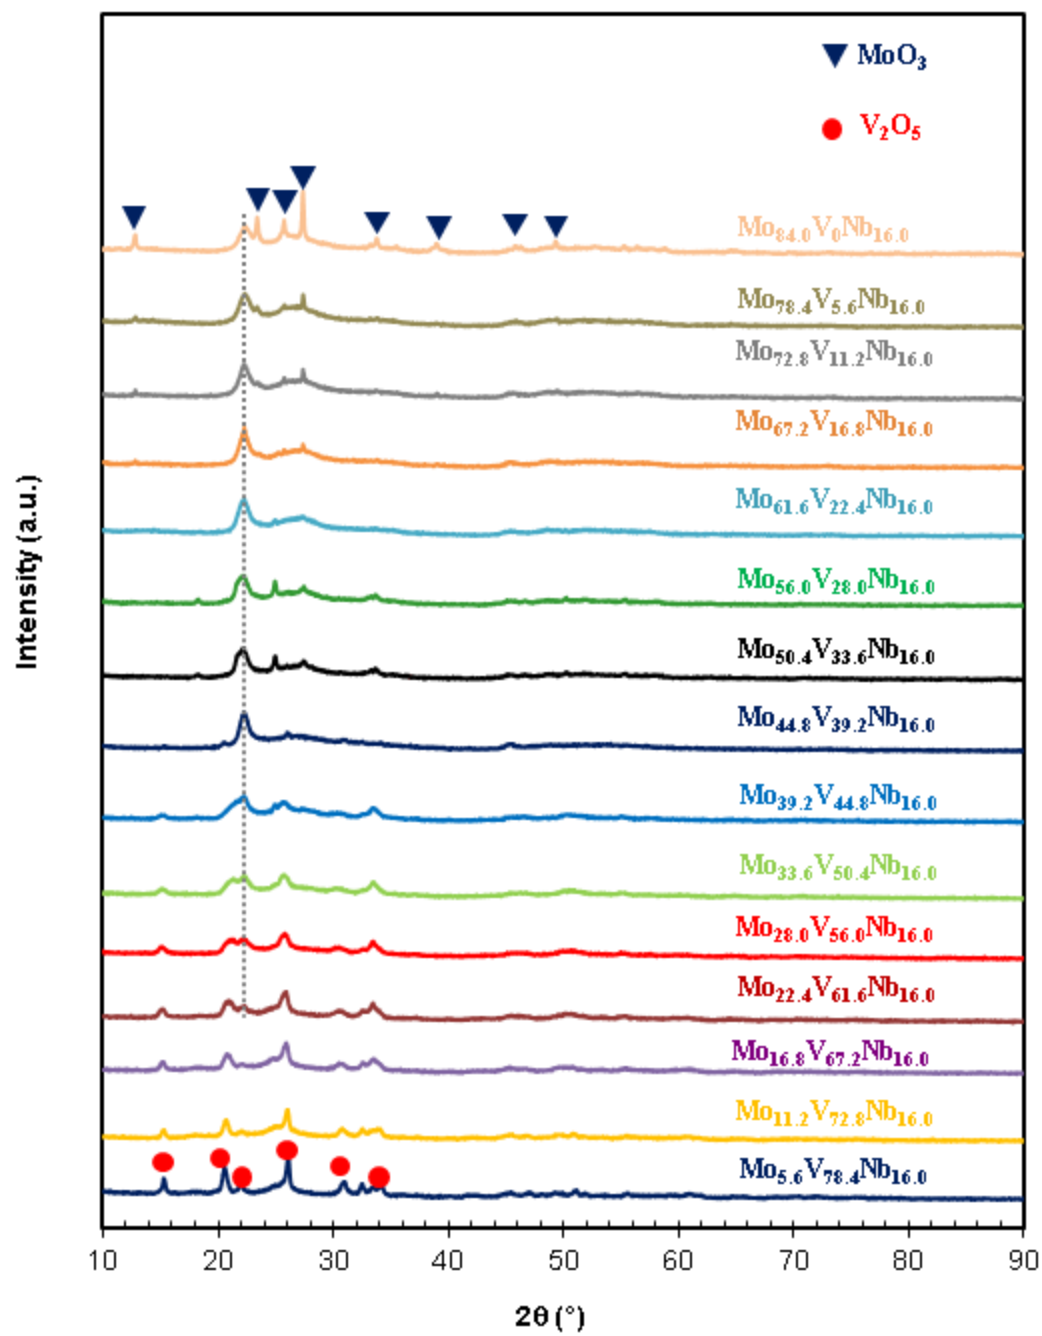

Fig. S9 XRD pattern of Mo-V-Nb mixed oxide samples with 16% of Nb loading.
